# Supplementary material for: The Study of Altered Brain Structure in Preterm Infants with Low Grade Intraventricular Hemorrhage Utilizing 3D T1WI Whole Brain MR Images
Source: Research Square preprint supplement (doi:10.21203/rs.3.rs-7361958/v1), 2025-09-02
Supplement: Supplementary file 1 [file 5e10b0905c2fd2460616ed1d.docx]

**Supplementary Material 1:**

The brain sub-regions segmentation module is implemented using a deep learning algorithm based on a 3D VB-NET network. The data preprocessing module performs a series of operations, including rotation, resampling, resizing, skull stripping, image non-uniform correction, histogram matching, and gray-scale normalization, on the MRI images of five types (AD, sMCI, pMCI, PD, NC) used for training and testing. All images are standardized to the size of 256*256*256*1 mm3 in the standard Cartesian LPI coordinate system, and the gray-scale range is within the interval (-1, 1).

The network training module uses an end-to-end deep convolutional neural network, taking each sample image and its corresponding brain substructure partition atlas as the training sample. The sample image is the network input, and the output label is the brain atlas correspondent to the sample image. The network parameters are adjusted according to the difference between the output brain division and the actual brain division, and the training continues until the network basically converges and the output label image is substantially consistent with the partition image corresponding to the sample. In the overall network training process, a coarse-to-fine cascading segmentation strategy is used, simplifying the complexity and difficulty of the brain segmentation problem by step decomposition, providing extra information to the lower level network by the upper level network to enhance the network's segmentation performance, and achieving fine segmentation of the large brain region, medium brain region, and brain substructures on a stage-by-stage basis.


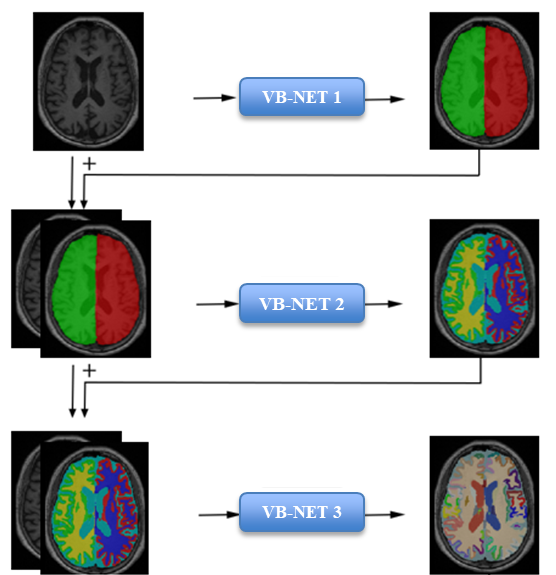


Fig S1 Cascading neural network framework

| Region | DK109 |
| --- | --- |
| 1 | Precentral_L |
| 2 | Precentral_R |
| 3 | Postcentral_L |
| 4 | Postcentral_R |
| 5 | Paracentral_L |
| 6 | Paracentral_R |
| 7 | Frontal_Sup_L |
| 8 | Frontal_Sup_R |
| 9 | Frontal_Mid_Rostral_L |
| 10 | Frontal_Mid_Rostral_R |
| 11 | Frontal_Mid_Caudal_L |
| 12 | Frontal_Mid_Caudal_R |
| 13 | Frontalpole_L |
| 14 | Frontalpole_R |
| 15 | Orbitofrontal_Lat_L |
| 16 | Orbitofrontal_Lat_R |
| 17 | Orbitofrontal_Med_L |
| 18 | Orbitofrontal_Med_R |
| 19 | Parsopercularis_L |
| 20 | Parsopercularis_R |
| 21 | Parsorbitalis_L |
| 22 | Parsorbitalis_R |
| 23 | Parstriangularis_L |
| 24 | Parstriangularis_R |
| 25 | Insula_L |
| 26 | Insula_R |
| 27 | Cingulum_Ant_L |
| 28 | Cingulum_Ant_R |
| 29 | Cingulum_Mid_L |
| 30 | Cingulum_Mid_R |
| 31 | Cingulum_Post_L |
| 32 | Cingulum_Post_R |
| 33 | Isthmuscingulate_L |
| 34 | Isthmuscingulate_R |
| 35 | Hippocampus_L |
| 36 | Hippocampus_R |
| 37 | Parahippocampal_L |
| 38 | Parahippocampal_R |
| 39 | Amygdala_L |
| 40 | Amygdala_R |
| 41 | Caudate_L |
| 42 | Caudate_R |
| 43 | Putamen_L |
| 44 | Putamen_R |
| 45 | Pallidum_L |
| 46 | Pallidum_R |
| 47 | Thalamus_L |
| 48 | Thalamus_R |
| 49 | Accumbens_Area_L |
| 50 | Accumbens_Area_R |
| 51 | VentralDC_L |
| 52 | VentralDC_R |
| 53 | Choroid_Plexus_L |
| 54 | Choroid_Plexus_R |
| 55 | Ventricle_Lat_L |
| 56 | Ventricle_Lat_R |
| 57 | Ventricle_Inf_Lat_L |
| 58 | Ventricle_Inf_Lat_R |
| 59 | Parietal_Sup_L |
| 60 | Parietal_Sup_R |
| 61 | Parietal_Inf_L |
| 62 | Parietal_Inf_R |
| 63 | Cuneus_L |
| 64 | Cuneus_R |
| 65 | Entorhinal_L |
| 66 | Entorhinal_R |
| 67 | Fusiform_L |
| 68 | Fusiform_R |
| 69 | Lingual_L |
| 70 | Lingual_R |
| 71 | Pericalcarine_L |
| 72 | Pericalcarine_R |
| 73 | Precuneus_L |
| 74 | Precuneus_R |
| 75 | Supramarginal_L |
| 76 | Supramarginal_R |
| 77 | Temporal_Sup_L |
| 78 | Temporal_Sup_R |
| 79 | Temporal_Mid_L |
| 80 | Temporal_Mid_R |
| 81 | Temporal_Inf_L |
| 82 | Temporal_Inf_R |
| 83 | Temporalpole_L |
| 84 | Temporalpole_R |
| 85 | Temporal_Sup_Banks_L |
| 86 | Temporal_Sup_Banks_R |
| 87 | Transversetemporal_L |
| 88 | Transversetemporal_R |
| 89 | Occipital_Lat_L |
| 90 | Occipital_Lat_R |
| 91 | Cerebral_WM_L |
| 92 | Cerebral_WM_R |
| 93 | Cerebellum_Cortex_L |
| 94 | Cerebellum_Cortex_R |
| 95 | Cerebellum_WM_L |
| 96 | Cerebellum_WM_R |
| 97 | Ventricle_3rd |
| 98 | Ventricle_4th |
| 99 | Pons |
| 100 | CSF |
| 101 | Optic_Chiasm |
| 102 | CC_Anterior |
| 103 | CC_Mid_Anterior |
| 104 | CC_Central |
| 105 | CC_Mid_Posterior |
| 106 | CC_Posterior |
| 107 | Midbrain |
| 108 | Medulla |
| 109 | SCP |

Table S1. DK109

**Supplementary Material 2:**

In addition, the cortical features including average thickness, average surface area and average curve are extracted from a total of 68 brain sub-regions. The detailed 68 gray matter sub-regions are listed as followed,

| Region | GM sub-region |
| --- | --- |
| 1 | Precentral_L |
| 2 | Precentral_R |
| 3 | Postcentral_L |
| 4 | Postcentral_R |
| 5 | Paracentral_L |
| 6 | Paracentral_R |
| 7 | Frontal_Sup_L |
| 8 | Frontal_Sup_R |
| 9 | Frontal_Mid_Rostral_L |
| 10 | Frontal_Mid_Rostral_R |
| 11 | Frontal_Mid_Caudal_L |
| 12 | Frontal_Mid_Caudal_R |
| 13 | Frontalpole_L |
| 14 | Frontalpole_R |
| 15 | Orbitofrontal_Lat_L |
| 16 | Orbitofrontal_Lat_R |
| 17 | Orbitofrontal_Med_L |
| 18 | Orbitofrontal_Med_R |
| 19 | Parsopercularis_L |
| 20 | Parsopercularis_R |
| 21 | Parsorbitalis_L |
| 22 | Parsorbitalis_R |
| 23 | Parstriangularis_L |
| 24 | Parstriangularis_R |
| 25 | Insula_L |
| 26 | Insula_R |
| 27 | Cingulum_Ant_L |
| 28 | Cingulum_Ant_R |
| 29 | Cingulum_Mid_L |
| 30 | Cingulum_Mid_R |
| 31 | Cingulum_Post_L |
| 32 | Cingulum_Post_R |
| 33 | Isthmuscingulate_L |
| 34 | Isthmuscingulate_R |
| 35 | Hippocampus_L |
| 36 | Hippocampus_R |
| 37 | Parahippocampal_L |
| 38 | Parahippocampal_R |
| 59 | Parietal_Sup_L |
| 60 | Parietal_Sup_R |
| 61 | Parietal_Inf_L |
| 62 | Parietal_Inf_R |
| 63 | Cuneus_L |
| 64 | Cuneus_R |
| 65 | Entorhinal_L |
| 66 | Entorhinal_R |
| 67 | Fusiform_L |
| 68 | Fusiform_R |
| 69 | Lingual_L |
| 70 | Lingual_R |
| 71 | Pericalcarine_L |
| 72 | Pericalcarine_R |
| 73 | Precuneus_L |
| 74 | Precuneus_R |
| 75 | Supramarginal_L |
| 76 | Supramarginal_R |
| 77 | Temporal_Sup_L |
| 78 | Temporal_Sup_R |
| 79 | Temporal_Mid_L |
| 80 | Temporal_Mid_R |
| 81 | Temporal_Inf_L |
| 82 | Temporal_Inf_R |
| 83 | Temporalpole_L |
| 84 | Temporalpole_R |
| 85 | Temporal_Sup_Banks_L |
| 86 | Temporal_Sup_Banks_R |
| 87 | Transversetemporal_L |
| 88 | Transversetemporal_R |
| 89 | Occipital_Lat_L |
| 90 | Occipital_Lat_R |

Table S2. 68 gray matter sub-regions
